# Supplementary material for: Comparison of porous carbons derived from sodium alginate and calcium alginate and their electrochemical properties
Source: Royal Society of Chemistry journal article supplement (doi:10.1039/c9ra09317f), 2020-01-01
Supplement: c9ra09317f1.pdf [file c9ra09317f1.pdf]

**Supplementary Information**

**Comparison of porous carbons derived from sodium alginate and calcium alginate and their electrochemical properties**

Ming Li<sup>a</sup>, Kuihua Han<sup>a,\*</sup>, Zhaocai Teng<sup>a</sup>, Jinxiao Li<sup>a</sup>, Meimei Wang<sup>a</sup> and Xian Li<sup>a</sup>

<sup>a</sup>School of Energy and Power Engineering, Shandong University, Jinan 250061, China.

\* Corresponding author: Tel:+86 0531 88392414; Email: [hankh@163.com](mailto:hankh@163.com)

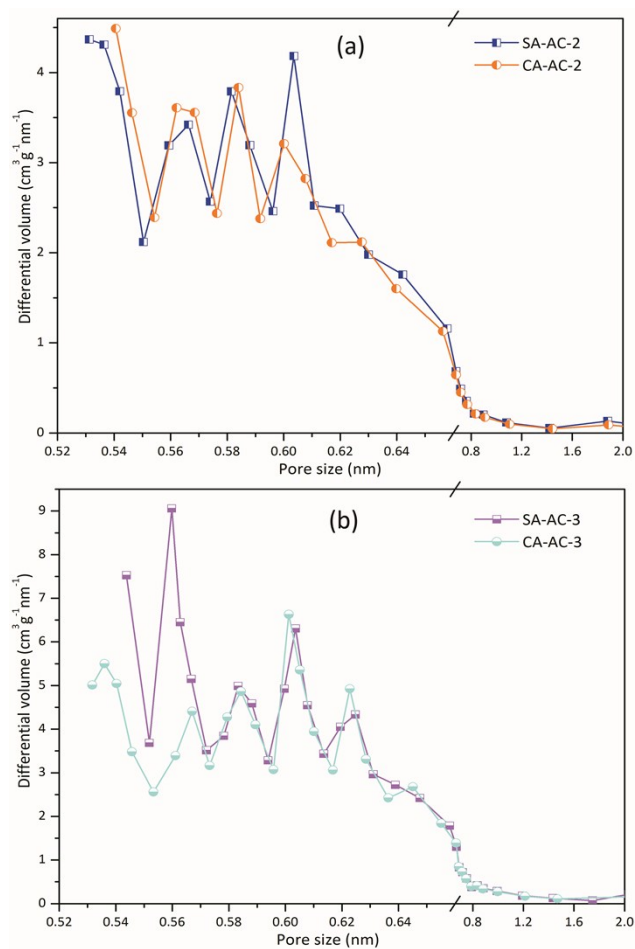

**Fig.S1** Micropore size distributions of SA-AC-2 and CA-AC-2 (a) and SA-AC-3 and CA-AC-3 (b).

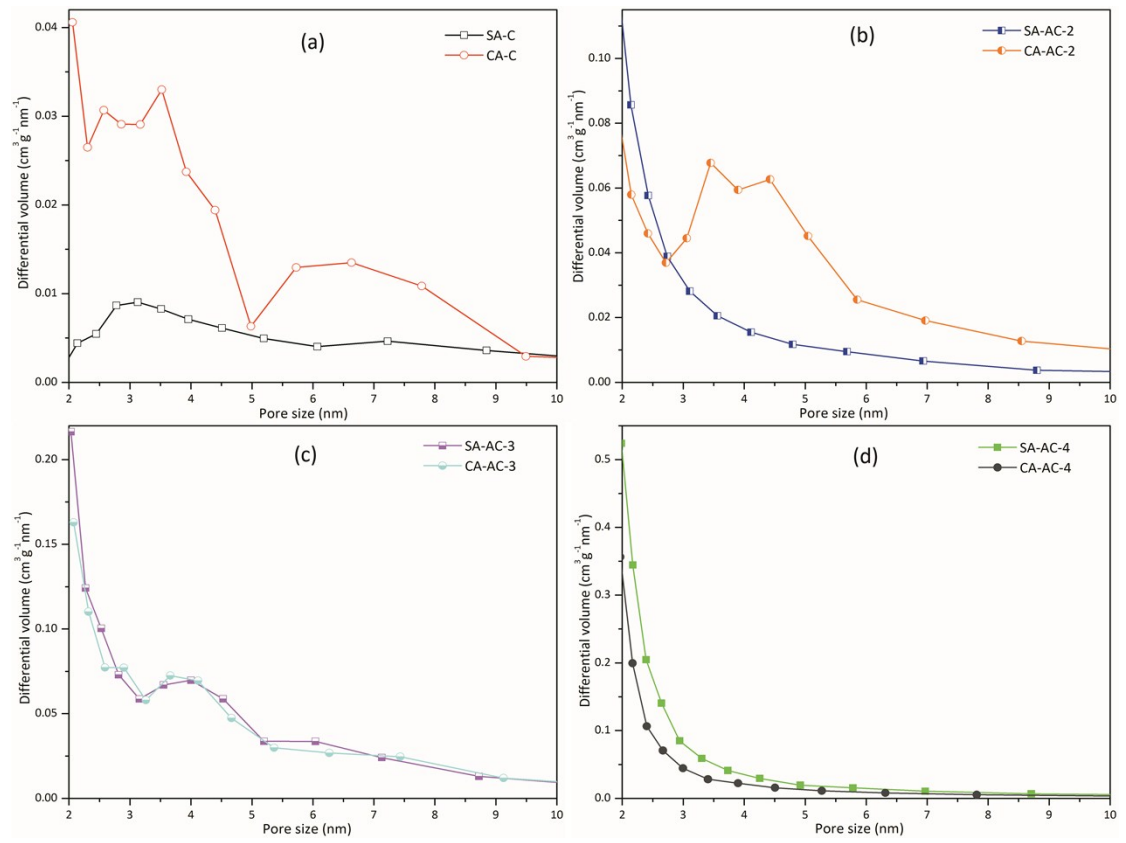

**Fig.S2** Mesopore size distributions of charcoals determined by BJH method.

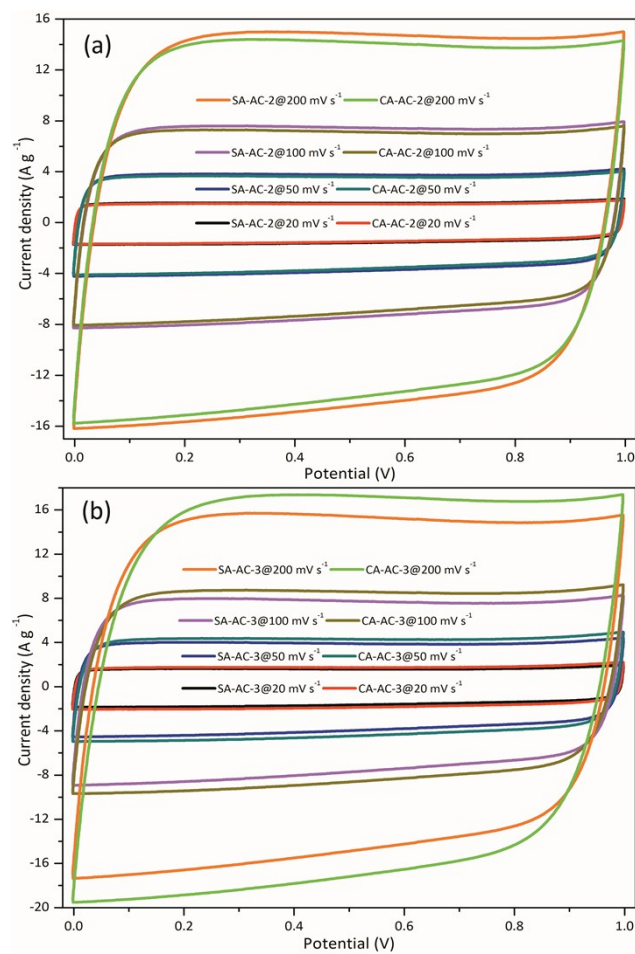

**Fig.S3** CV curves of SA-AC-2 and CA-AC-2 (a) and SA-AC-3 and CA-AC-3 (b) at various scan rates.

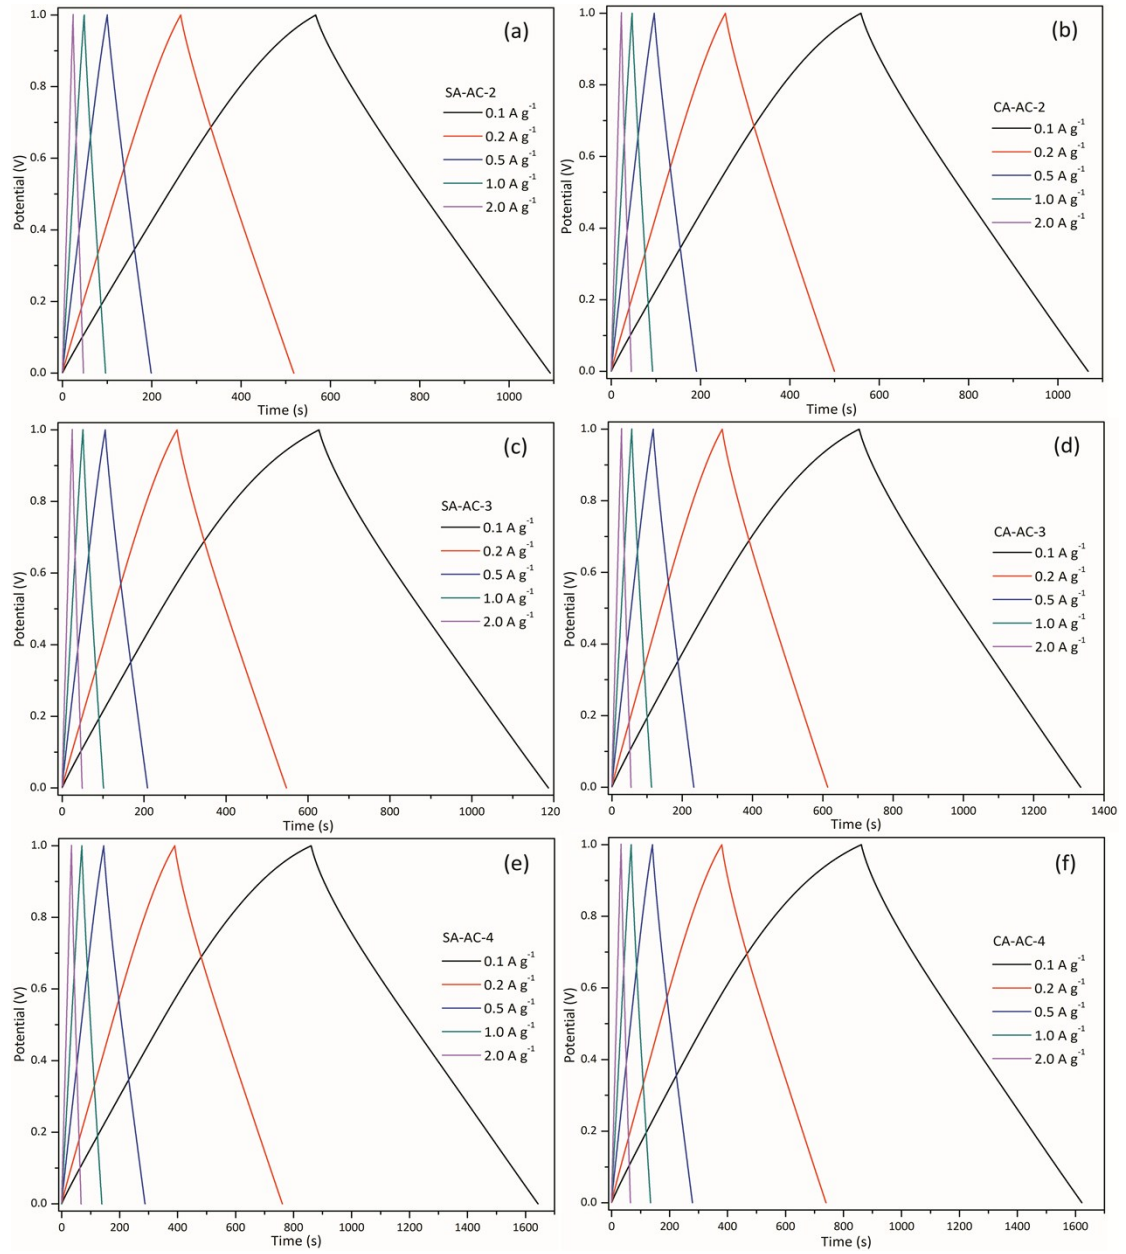

**Fig.S4** GCD curves of SA-AC-2 (a), CA-AC-2 (b), SA-AC-3 (c), CA-AC-3 (d), SA-AC-4 (e) and CA-AC-4 (f) at various current densities.

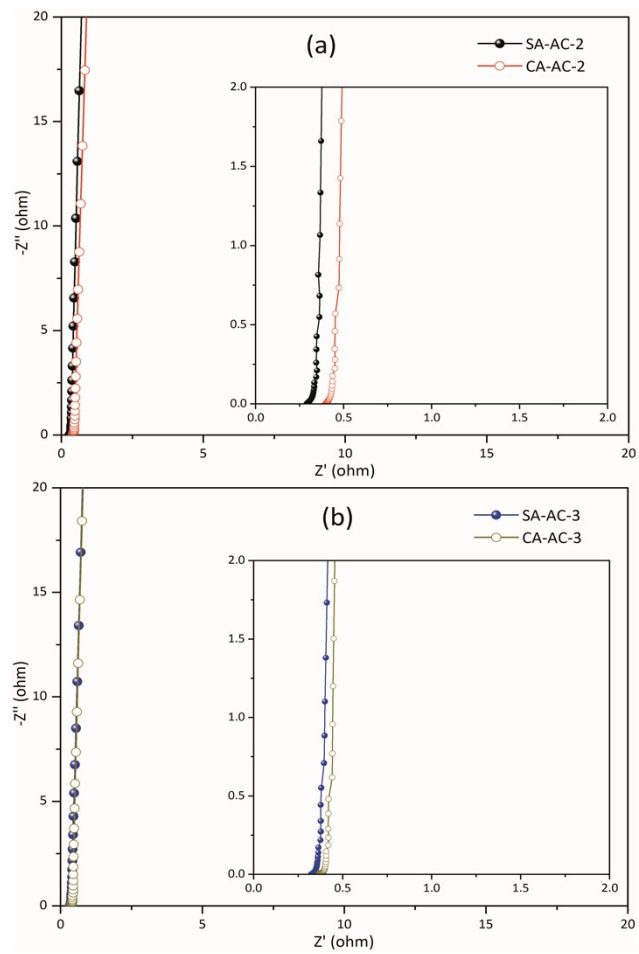

**Fig.S5** Nyquist plots for SA-AC-2 and CA-AC-2 (a) and SA-AC-3 and CA-AC-3 (b). Insets provide the data at high frequency.

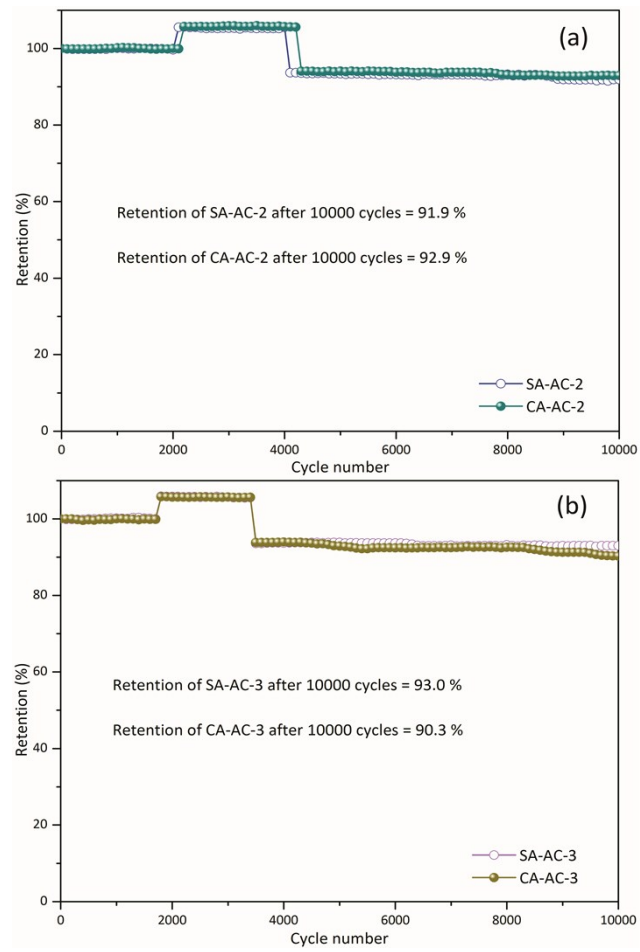

**Fig.S6** Cycle performance curves of SA-AC-2 and CA-AC-2 (a) and SA-AC-3 and CA-AC-3 (b) at the current density of  $5 \text{ A g}^{-1}$ .

**Table S1** Mass specific capacitance of charcoals at various current densities.

|                   | SA-AC-2                   | CA-AC-2 | SA-AC-3 | CA-AC-3 | SA-AC-4 | CA-AC-4 |
|-------------------|---------------------------|---------|---------|---------|---------|---------|
| Current density   | Mass specific capacitance |         |         |         |         |         |
| A g <sup>-1</sup> | F g <sup>-1</sup>         |         |         |         |         |         |
| 0.1               | 209.5                     | 203.0   | 223.9   | 251.9   | 312.9   | 304.3   |
| 0.2               | 201.7                     | 194.5   | 212.7   | 239.0   | 295.6   | 286.3   |
| 0.5               | 195.7                     | 187.8   | 205.3   | 229.9   | 283.2   | 274.5   |
| 1                 | 191.0                     | 182.8   | 199.8   | 223.5   | 274.1   | 265.9   |
| 2                 | 184.0                     | 176.0   | 192.2   | 215.1   | 262.3   | 254.3   |
| 5                 | 176.1                     | 167.9   | 183.0   | 204.2   | 248.8   | 240.4   |
| 10                | 162.6                     | 153.5   | 171.0   | 190.1   | 232.0   | 220.5   |
| 20                | 144.2                     | 141.7   | 153.9   | 165.3   | 207.4   | 194.0   |
| 30                | 124.4                     | 124.1   | 133.7   | 135.8   | 185.9   | 168.9   |
| 40                | 105.9                     | 109.0   | 119.1   | 122.5   | 165.5   | 139.3   |
| 50                | 92.2                      | 92.0    | 101.6   | 95.8    | 144.8   | 118.2   |
